# Supplementary material for: Disulfides from the Brown Alga Dictyopteris Membranacea Suppress M1 Macrophage Activation by Inducing AKT and Suppressing MAPK/ERK Signaling Pathways
Source: PubMed Central journal article supplement (PMC7690855; doi:10.3390/md18110527), 2020-10-24
Supplement: marinedrugs-18-00527-s001.pdf [file marinedrugs-18-00527-s001.pdf]

## Supplementary Materials for

# Disulfides from the brown alga *Dictyopterus membranacea* suppress M1 macrophage activation by inducing AKT and suppressing MAPK/ERK signaling pathways

Maria G. Daskalaki <sup>1,2</sup>, Paraskevi Bafiti <sup>1</sup>, Stefanos Kikionis <sup>3</sup>, Maria Laskou <sup>1</sup>, Vassilios Roussis <sup>3</sup>, Efstathia Ioannou <sup>3</sup>, Sotirios C. Kampranis <sup>4,\*</sup> and Christos Tsatsanis <sup>1,2,\*</sup>

- <sup>1</sup> Laboratory of Clinical Chemistry, School of Medicine, University of Crete, Heraklion 70013, Greece; m.daskalaki@med.uoc.gr (M.G.D.); vivi.mpafiti@gmail.com (P.B.); maria.laskou95@gmail.com (M.L.)  
<sup>2</sup> Institute of Molecular Biology and Biotechnology, FORTH, Heraklion 71100, Greece  
<sup>3</sup> Section of Pharmacognosy and Chemistry of Natural Products, Department of Pharmacy, National and Kapodistrian University of Athens, Panepistimiopolis Zographou, Athens 15771, Greece; skikionis@pharm.uoa.gr (S.K.); roussis@pharm.uoa.gr (V.R.); eioannou@pharm.uoa.gr (E.I.)  
<sup>4</sup> Section of Plant Biochemistry, Department of Plant and Environmental Sciences, University of Copenhagen, Thorvaldsensvej 40, 1871 Frederiksberg, Denmark  
\* Correspondence: tsatsani@med.uoc.gr (C.T.); soka@plen.ku.dk (S.C.K.); Tel.: +30-2810-394833 (C.T.); +45-3131-5539 (S.C.K.)

**Table S1. List of oligonucleotides used in real time PCR reactions.**

| Primer             | Sequence               |
|--------------------|------------------------|
| rsp9-Fwd           | GCTAGACGAGAAGGATCCCC   |
| Rsp9-Rev           | CAGGCCAGCTTAAAGACCT    |
| Arginase 1-Fwd     | CAGAAGAATGGAAGAGTCAG   |
| Arginase 1-Rev     | CAGATATGCAGGGAGTCACC   |
| MRC1-Fwd           | TTCCATCGAGACTGCTGC     |
| MRC1-Rev           | ACCAAAGCCACTTCCCTTC    |
| IRAK-M-Fwd         | TTCTGGCACGTTTCAATCA    |
| IRAK-M-Rev         | CGCTGCAGCAAAATCCGTTA   |
| iNOS-Fwd           | TCCTGGAGGAAGTGGGCCGAAG |
| iNOS-Rev           | CCTCCACGGGCCCGTACTC    |
| TNF $\alpha$ -Fwd  | GCCCACGTCGTAGCAAACCACC |
| TNF $\alpha$ -Rev  | CGGGGCAGCCTTGTCCCTTG   |
| Glut1-Fwd          | AAAGAAGAGGGTCGGCAGAT   |
| Glut1-Rev          | CTGCCTTCTCGAAGATGCTC   |
| Glut3-Fwd          | GATCGGCTCTTCCAGTTTG    |
| Glut3-Rev          | GATCGGCTCTTCCAGTTTG    |
| Pgc1 $\alpha$ -Fwd | ACCCTGCCATTGTTAAGACC   |
| Pgc1 $\alpha$ -Rev | TGCTGCTGTTCTGTTTTTC    |
| IL-6-Fwd           | CAAAGCCAGAGTCCTTCAGAG  |
| IL-6-Rev           | CACTCCTTCTGTGACTCCAGC  |

Supplementary figures: Purity analysis of the isolated compounds

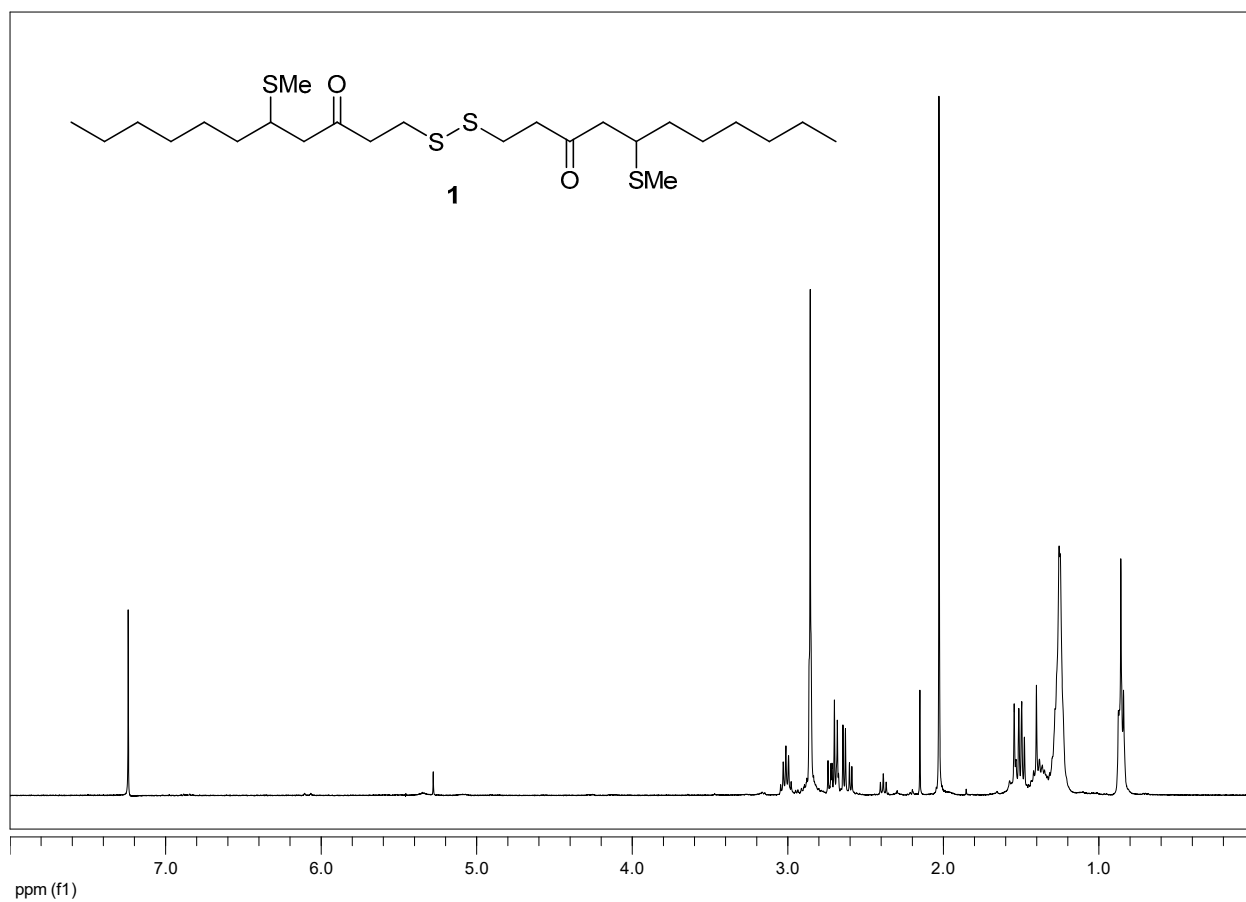

**Figure S1.** <sup>1</sup>H NMR spectrum (400 MHz, CDCl<sub>3</sub>) of bis(5-methylthio-3-oxo-undecyl) disulfide (1).

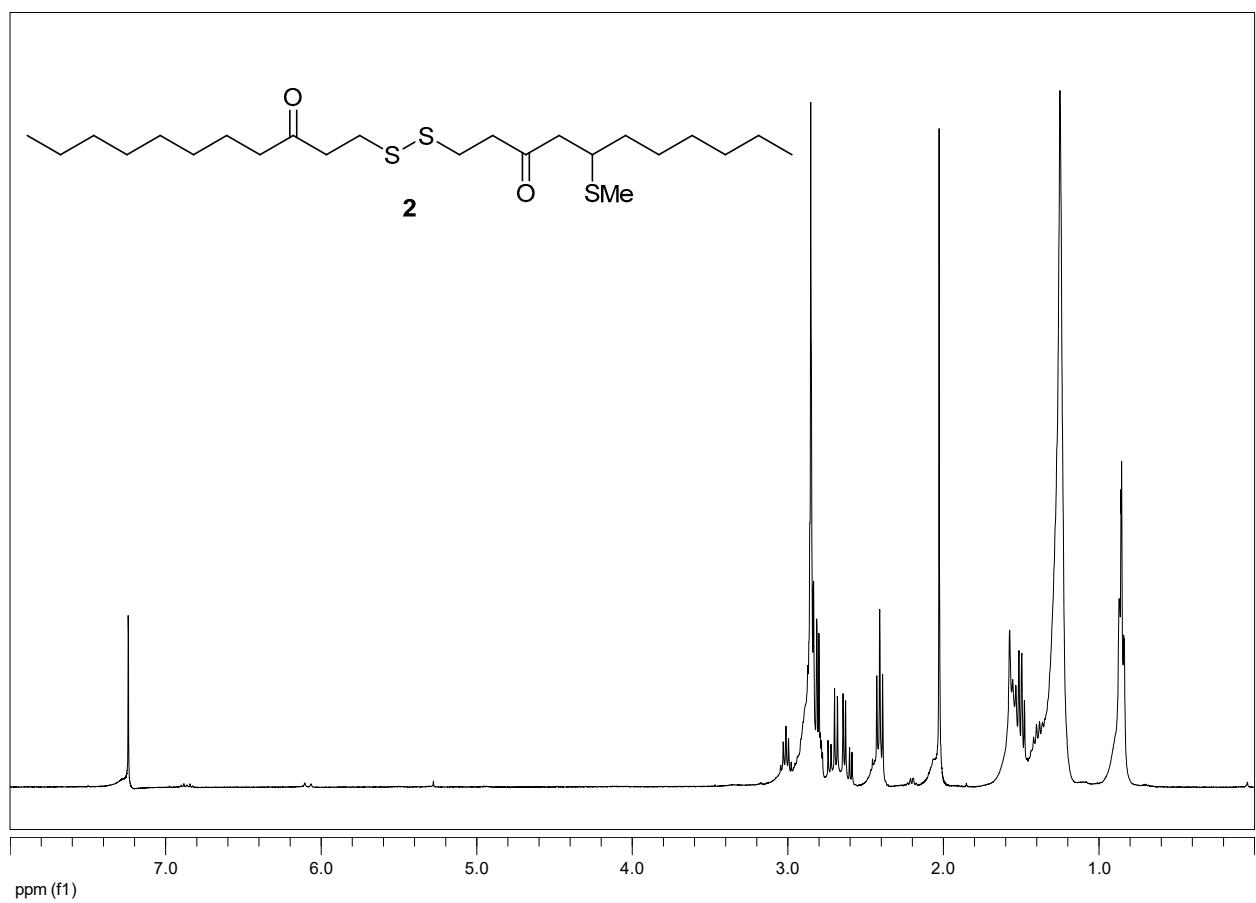

**Figure S2.** <sup>1</sup>H NMR spectrum (400 MHz, CDCl<sub>3</sub>) of 5-methylthio-1-(3-oxoundecyl)disulfanylundecan-3-one (**2**).

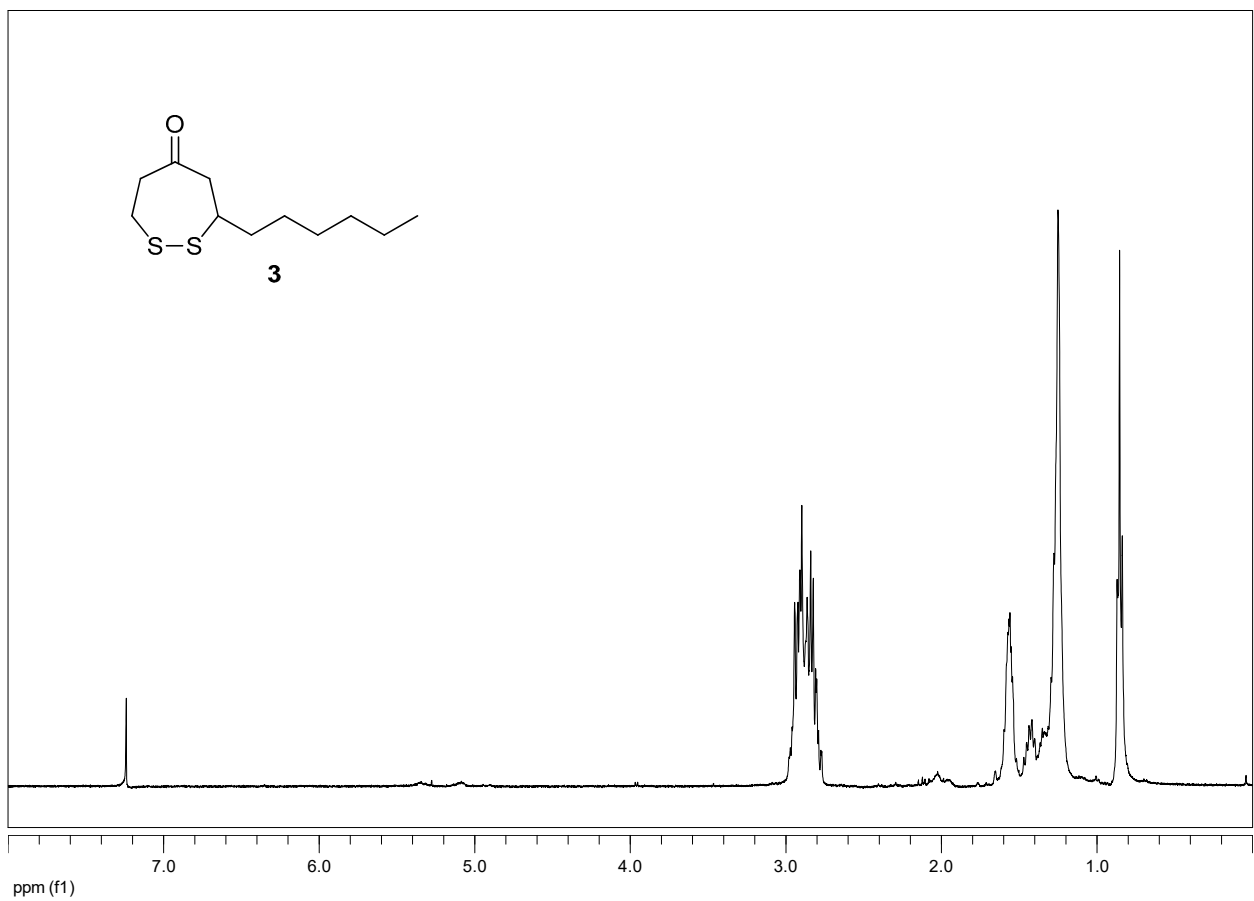

**Figure S3.** <sup>1</sup>H NMR spectrum (400 MHz, CDCl<sub>3</sub>) of 3-hexyl-4,5-dithiacycloheptanone (**3**).
